# Supplementary material
Source: MDPI journal article supplement (https://www.mdpi.com/2311-7524/10/3/201)
Supplement: s1 [file s1]

**Table S1.** Germination Experiment 1. Mean  $\pm$  standard error of germinated seeds per plate and per treatment over time in the germination experiment. The same letter between treatments in the same day indicates no significant differences according to the LSD post hoc test.

| Treatment | Day 3                       | Day 5                       | Day 11                      | Day 18                      | Day 25                      | Day 42                       |
|-----------|-----------------------------|-----------------------------|-----------------------------|-----------------------------|-----------------------------|------------------------------|
| Control   | 0.8 $\pm$ 0.49 <sup>a</sup> | 1.6 $\pm$ 0.40 <sup>a</sup> | 3.2 $\pm$ 0.58 <sup>a</sup> | 3.6 $\pm$ 0.51 <sup>a</sup> | 6.2 $\pm$ 0.73 <sup>a</sup> | 7.2 $\pm$ 0.73 <sup>a</sup>  |
| 250 PPM   | 1.2 $\pm$ 0.58 <sup>a</sup> | 2.6 $\pm$ 0.68 <sup>a</sup> | 5.2 $\pm$ 0.58 <sup>b</sup> | 6.0 $\pm$ 0.71 <sup>b</sup> | 8.6 $\pm$ 0.60 <sup>a</sup> | 9.8 $\pm$ 0.20 <sup>b</sup>  |
| 500 PPM   | 0.8 $\pm$ 0.37 <sup>a</sup> | 1.2 $\pm$ 0.37 <sup>a</sup> | 2.8 $\pm$ 0.58 <sup>a</sup> | 3.8 $\pm$ 0.66 <sup>a</sup> | 6.4 $\pm$ 1.03 <sup>a</sup> | 8.0 $\pm$ 0.89 <sup>ab</sup> |
| P-Value   | 0,8040                      | 0,1711                      | 0,0284                      | 0,0362                      | 0,1065                      | 0,0509                       |

**Table S2.** Germination Experiment 2. Mean  $\pm$  standard error of germinated seeds per plate and per treatment over time in the germination experiment. The same letter between treatments in the same day indicates no significant differences according to the LSD post hoc test.

| Treatment | Day 1                        | Day 3                         | Day 5                         | Day 8                         | Day 15                        | Day 21                        | Day 28                        | Day 35                        | Day 42                        |
|-----------|------------------------------|-------------------------------|-------------------------------|-------------------------------|-------------------------------|-------------------------------|-------------------------------|-------------------------------|-------------------------------|
| Control   | 0.40 $\pm$ 0.24 <sup>b</sup> | 1.00 $\pm$ 0.32 <sup>b</sup>  | 1.20 $\pm$ 0.20 <sup>ab</sup> | 2.00 $\pm$ 0.32 <sup>ab</sup> | 2.80 $\pm$ 0.58 <sup>ab</sup> | 3.20 $\pm$ 0.66 <sup>ab</sup> | 3.20 $\pm$ 0.66 <sup>a</sup>  | 4.20 $\pm$ 0.66 <sup>ab</sup> | 4.60 $\pm$ 0.81 <sup>a</sup>  |
| 125PPM    | 0.00 $\pm$ 0.00 <sup>a</sup> | 0.80 $\pm$ 0.49 <sup>ab</sup> | 1.20 $\pm$ 0.49 <sup>ab</sup> | 2.80 $\pm$ 0.49 <sup>ab</sup> | 3.40 $\pm$ 0.75 <sup>ab</sup> | 4.40 $\pm$ 0.93 <sup>ab</sup> | 4.80 $\pm$ 0.73 <sup>ab</sup> | 6.20 $\pm$ 0.81 <sup>bc</sup> | 7.00 $\pm$ 0.84 <sup>b</sup>  |
| 250PPM    | 0.00 $\pm$ 0.00 <sup>a</sup> | 0.80 $\pm$ 0.20 <sup>ab</sup> | 2.00 $\pm$ 0.45 <sup>b</sup>  | 3.60 $\pm$ 0.81 <sup>b</sup>  | 4.00 $\pm$ 1.05 <sup>b</sup>  | 5.00 $\pm$ 1.14 <sup>b</sup>  | 6.00 $\pm$ 0.95 <sup>b</sup>  | 8.00 $\pm$ 1.10 <sup>c</sup>  | 9.40 $\pm$ 0.40 <sup>c</sup>  |
| 375PPM    | 0.00 $\pm$ 0.00 <sup>a</sup> | 1.20 $\pm$ 0.20 <sup>b</sup>  | 1.60 $\pm$ 0.40 <sup>b</sup>  | 1.80 $\pm$ 0.49 <sup>a</sup>  | 2.40 $\pm$ 0.51 <sup>ab</sup> | 3.00 $\pm$ 0.77 <sup>ab</sup> | 4.00 $\pm$ 0.71 <sup>ab</sup> | 5.00 $\pm$ 0.71 <sup>ab</sup> | 5.60 $\pm$ 0.81 <sup>ab</sup> |
| 500PPM    | 0.00 $\pm$ 0.00 <sup>a</sup> | 0.00 $\pm$ 0.00 <sup>a</sup>  | 0.40 $\pm$ 0.24 <sup>a</sup>  | 1.40 $\pm$ 0.51 <sup>a</sup>  | 1.80 $\pm$ 0.37 <sup>a</sup>  | 2.40 $\pm$ 0.51 <sup>a</sup>  | 3.00 $\pm$ 0.45 <sup>a</sup>  | 3.40 $\pm$ 0.75 <sup>a</sup>  | 3.60 $\pm$ 0.68 <sup>a</sup>  |
| P-Value   | 0,0623                       | 0,0772                        | 0,0739                        | 0,0692                        | 0,2330                        | 0,2016                        | 0,0458                        | 0,0076                        | 0,0002                        |
